# Supplementary material
Source: PubMed Central journal article supplement (PMC4119041)
Supplement: supp_pp.114.242990_242990SUPPLEMENTAL_MATERIAL.pdf [file supp_pp.114.242990_242990SUPPLEMENTAL_MATERIAL.pdf]

## SUPPLEMENTAL MATERIAL

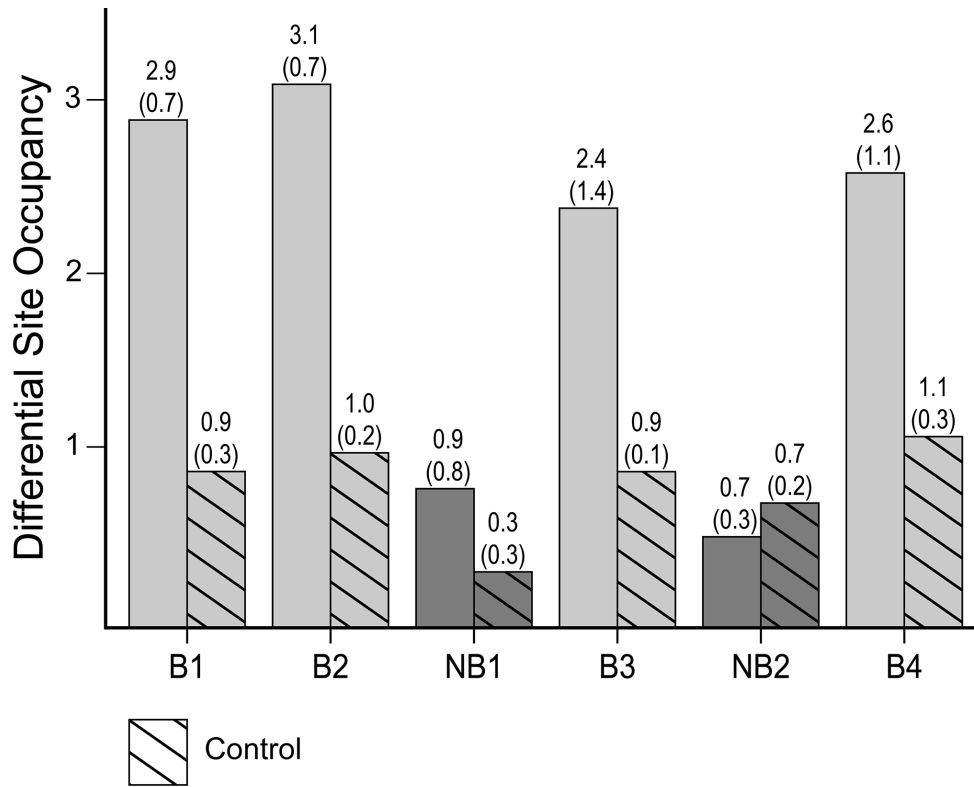

**Figure S1.** Co-precipitation of select DNA fragments using IgG-Sepharose to isolate complexes via the protein A domain in a TAP-tag added to the C-terminal end of AGL15 (35S:AGL15-TAP, solid bars). Nontagged tissue served as a control (35S:AGL15, hatched bars). DSO calculations from three independent experiments comparing recovery of target to nonbound control (*TUA3*) in the same immune precipitation is shown. The averages (standard deviations) are shown.

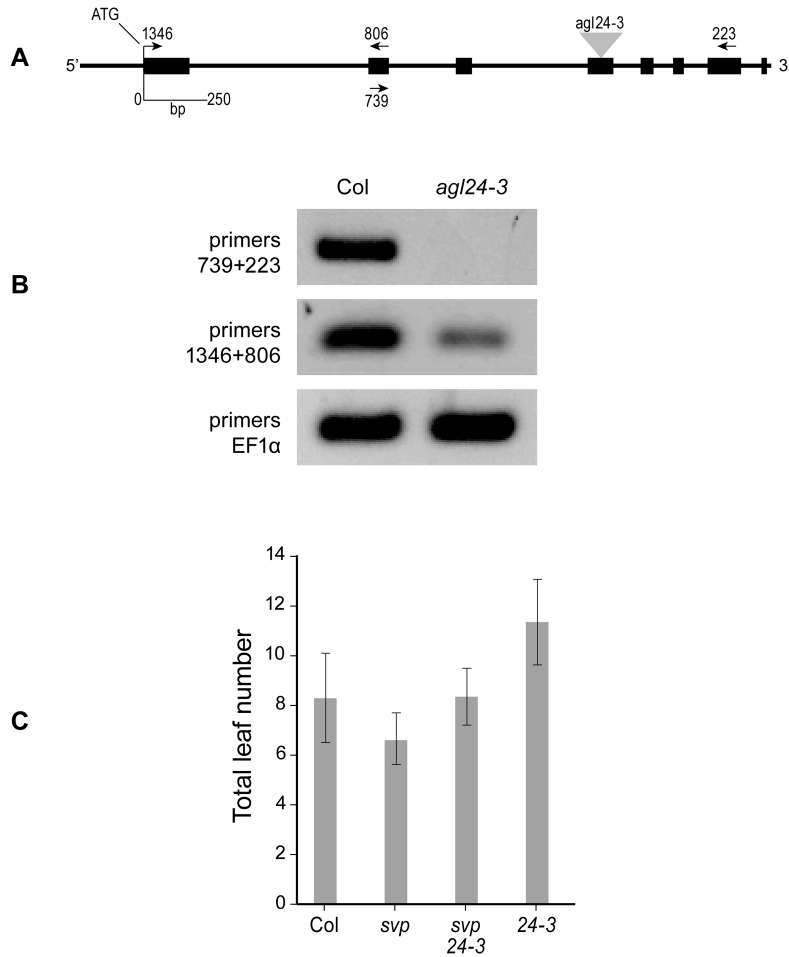

**Figure S2.** Analysis of the *agl24-3* mutant allele. (A) Gene diagram showing positions of the T-DNA insertion in the *agl24-3* (SALK\_095007) mutant and RT-PCR primers. Black boxes indicate exons in the coding sequence. (B) RT-PCR of wild type Columbia and homozygous *agl24-3* seedlings with gene-specific primers (primer 223: AAGTGTCGGAGTCATCCTCAAG, primer 739: CAAATTGATGGATCCACCTTC, primer 806: CGGAGATGAGTAGAAGGTGGA, primer 1346: AAAATGGCGAGAGAGAAGATAAGG). Although transcripts that encode the region upstream of the insertion accumulate at reduced levels, no full-length transcripts can be detected in *agl24-3* plants. (C) Flowering time under LD conditions of the *agl24-3* allele alone and in combination with *svp* mutations. The means  $\pm$  1 standard deviation are shown ( $n \geq 24$  plants).

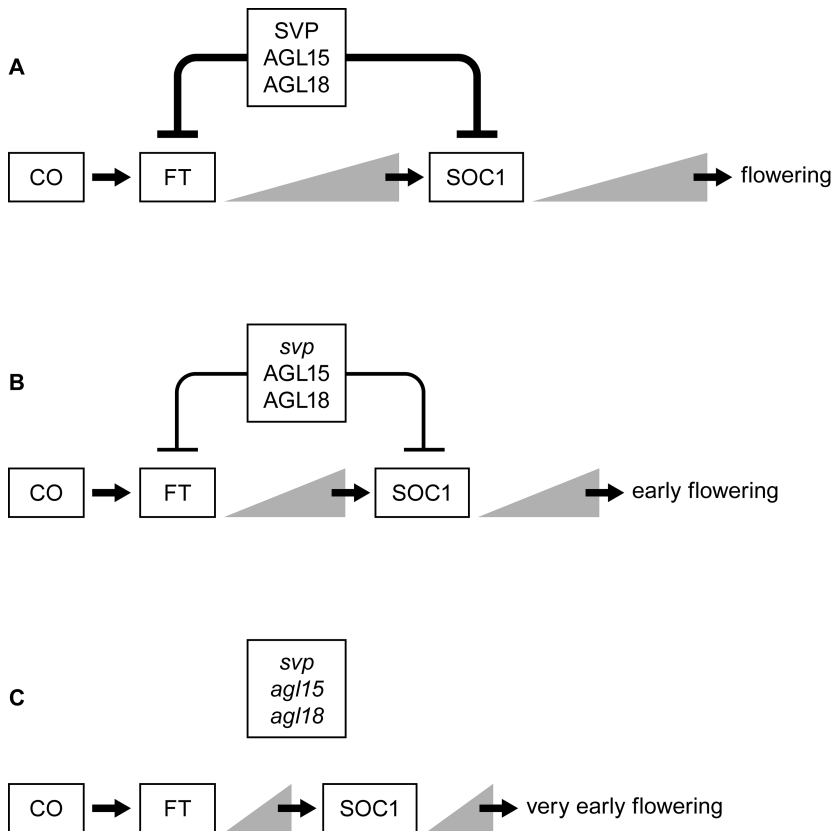

**Figure S3.** Model summarizing the effects of *agl15*, *agl18*, and *svp* mutations on *FT* and *SOC1* expression and flowering time under inductive conditions. (A) *FT* and *SOC1* serve as floral integrators and are direct targets of the floral repressors, including *SVP*, *AGL15* and *AGL18*. (B) In the absence of *SVP*, *FT* and *SOC1* reach levels necessary to induce flowering more quickly, resulting in earlier flowering. (C) *agl15 agl18* mutations enhance the effect of *svp* mutations, allowing *FT* and *SOC1* levels to increase even more quickly, resulting in very early flowering.

**Table SI.** Oligonucleotides used for PCR genotyping

| allele                         | Forward                       | Reverse                             |
|--------------------------------|-------------------------------|-------------------------------------|
| <i>agl15-3</i>                 | TTATCTAGATGGGTCGTGGAAAAATCGAG | GCGTGGACCGCTTGCTGCAACT              |
| <i>AGL15</i>                   | TTATCTAGATGGGTCGTGGAAAAATCGAG | AATATCCACCTCTGCACAATCCTCCT          |
| <i>agl18-1</i>                 | GCGTGGACCGCTTGCTGCAACT        | TGCATCTCCCAAATTCTGATAC              |
| <i>AGL18</i>                   | CCACAGAGCCCAGGTTGATT          | TGCATCTCCCAAATTCTGATAC              |
| <i>agl24-3</i>                 | GCGTGGACCGCTTGCTGCAACT        | AAGTGTCGGAGTCATCCTCAAG              |
| <i>AGL24</i>                   | CAAATTGATGGATCCACCTTC         | AAGTGTCGGAGTCATCCTCAAG              |
| <i>KNAT1p:</i><br><i>AGL15</i> | GGTGCAACTTCACCTCACAA          | ACCGTATCTGGAAAGTGTTTGCTTCATT        |
| <i>sep3-2</i>                  | AAAGTGTTGGTGAGAGTGGAA         | GAGCGTCGGTCCCCACACTTCTATAC          |
| <i>SEP3</i>                    | AAAGTGTTGGTGAGAGTGGAA         | AACCCTAATTTTCATATCAGATAGATTG        |
| <i>soc1-2</i>                  | TTGGGTGATGGTTCACGTAGTGGG      | ATATCACAAACCGTTTAGAAGCTTCGAGTTGTTCA |
| <i>SOC1</i>                    | TGTGCTCTTTTCGTAGCCAAT         | ATATCACAAACCGTTTAGAAGCTTCGAGTTGTTCA |
| <i>SUC2p:</i><br><i>AGL15</i>  | CACGTGTCACGAAGATACCC          | ACCGTATCTGGAAAGTGTTTGCTTCATT        |
| <i>svp-32</i>                  | GAAGGAAGTCCTAGAGAGGCATAAC     | GCGTGGACCGCTTGCTGCAACT              |
| <i>SVP</i>                     | GAAGGAAGTCCTAGAGAGGCATAAC     | CGTTAGTAATAGACTCCGACGACTG           |

**Table SII.** Oligonucleotides used for qPCR analyses

| Gene                                         | Forward                         | Reverse                         |
|----------------------------------------------|---------------------------------|---------------------------------|
| <i>AG</i>                                    | AGATTAGAGAGAAGTATTACCCGAATC     | GTCTTGGCGACCCGCGGATGAGTAATG     |
| <i>AGL15</i>                                 | GCAAACACTTTCCAGATACGG           | CTTGCCCTGCAGTTGTAAATG           |
| <i>AP1</i>                                   | GCAAGCAATGAGCCCTAAAG            | ACTGCTCCTGTTGAGCCCTA            |
| <i>AP3</i>                                   | ATACAAAAGAATCTCATACATGAGCTG     | AATGATGTCAGAGGCAGAGGGTGCATG     |
| <i>CN1</i><br><i>At2g28390</i>               | CCCCCAGTAACTAGTCACAGACA         | TGATTGCATATCTTTATCGCCATC        |
| <i>FT</i>                                    | CTGGAACAACCTTTGGCAAT            | AGCCACTCTCCCTCTGACAA            |
| <i>FT-1B</i>                                 | CGTTGATGATAGTGAAGTGAGACATCTTGGC | CGTCTCGATACTTTGCACTCATCCAATCC   |
| <i>FT-2B</i>                                 | GCCAAAGAGAGGTGACTAATGGCT        | AGTTCCTGAGGTCTTCTCCACCAA        |
| <i>FT-3B</i>                                 | CATTGGTGCACGTGTACATACACCTCTTGG  | GGTTTGACAAGACTGTCCGTATGATGGAG   |
| <i>FT-4B</i>                                 | CAGTCACAACGACGAATTCATTTGAGCTCTG | GAGAGGTTCTTTAGGGTTTATTGGGTCTAGT |
| <i>FT-NB1</i>                                | AGCATAGCTCAAACATGTTGCTCG        | GGGAGACAAATTGATGCATCGCAC        |
| <i>FT-NB2</i>                                | CGCCTCTAGGTATGTATAGAAGGTTGACCAC | CATGTTTACACACGGAAGTGGAAGCACTCG  |
| <i>FUL</i>                                   | TGCGTAACCTCCTCCAGAGAT           | GTTCTACTCGTTCGTAGTGGTAGGAC      |
| <i>PI</i>                                    | AAGAAAGAGAATGATAGCTTACAACCTG    | CACTCTATATCCAAACTGCCCATCATG     |
| <i>SEP3</i>                                  | CTAAGACTAAGGTTAGCTGATGGGTA      | ATGATGACGACCGTAGTGATCAA         |
| <i>TUA3</i><br><i>At5g19770</i>              | AGGGCTTACCACGAGCAGCTATCA        | ACAGGCCATGTACTTTCCGTGTCT        |
| $\beta$ - <i>tubulin</i><br><i>At5g62690</i> | AAACTCACTACCCCCAGCTTTG          | CACCAGACATAGTAGCAGAAATCAAGT     |
